# Supplementary material for: Leaching of iron from copper tailings by sulfuric acid: behavior, kinetics and mechanism
Source: Royal Society of Chemistry journal article supplement (doi:10.1039/d0ra08865j), 2021-01-01
Supplement: d0ra08865j1.pdf [file d0ra08865j1.pdf]

## Supporting information

Leaching of iron from copper tailings by sulfuric acid: behavior, kinetics and mechanism

Lei Tao<sup>a</sup>, Langlang Wang<sup>a</sup>, Kanghuai Yang<sup>a</sup>, Xueqian Wang<sup>a\*</sup>, Lu Chen<sup>b\*</sup>, Ping Ning<sup>a</sup>

a. Faculty of Environmental Science and Engineering, Kunming University of Science and Technology, PR, China

b. Faculty of Business Administration, Yunnan JiaoTong College, PR, China

**Fig. S1** Effect of temperature on leaching of iron from primary Fe<sub>3</sub>O<sub>4</sub>-containing mineral and pure Fe<sub>3</sub>O<sub>4</sub>.

**Fig. S2** S 2p spectra for the raw and leached copper tailings.

**Fig. S3** Flow diagram of recovery Fe, Zn, and copper from copper tailing by sulfuric acid leaching.

**Table S1** Peak positions, FWHM, and relative abundance from curve fitting of O 1s for raw and leached copper tailings.

---

\* Corresponding author:

E-mail: wxq3000@aliyun.com (X. Q. Wang). Tel: +86 13888183303.

175394073@qq.com (L. Chen).

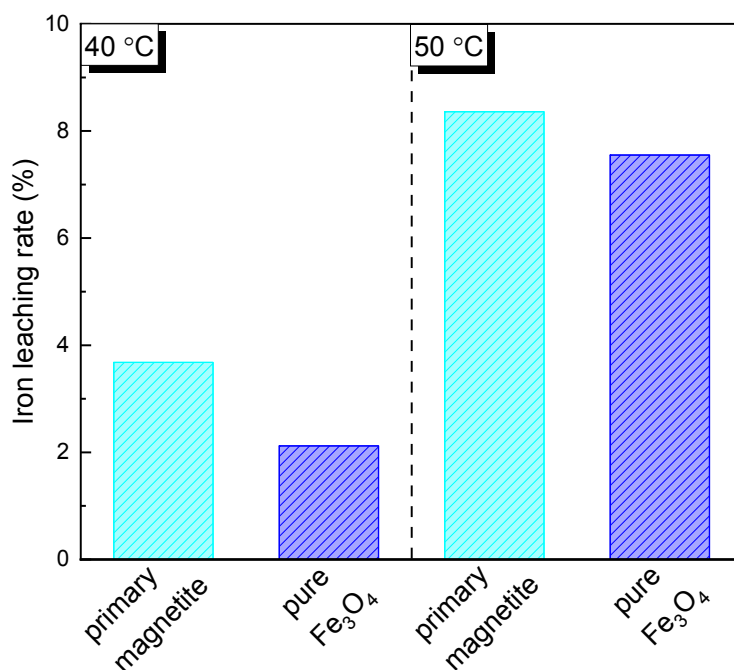

**Fig. S1** Effect of temperature on Leaching of iron from primary Fe<sub>3</sub>O<sub>4</sub>-containing mineral and pure Fe<sub>3</sub>O<sub>4</sub>. Experimental conditions: S/L ratio, 1: 10; sulfuric acid, 5%; stirring ratio, 400 rpm, and reaction time, 120 min.

To demonstrate the effect of temperature on the leaching of iron from Fe<sub>3</sub>O<sub>4</sub>, primary Fe<sub>3</sub>O<sub>4</sub>-containing mineral and pure Fe<sub>3</sub>O<sub>4</sub> was used to study the leaching behavior. XRF analysis of the primary Fe<sub>3</sub>O<sub>4</sub>-containing mineral is as follows: Fe<sub>2</sub>O<sub>3</sub>, 57.26 wt.%, SiO<sub>2</sub>, 21.29 wt.%, MgO, 8.97 wt.%, CaO, 7.48 wt.%, SO<sub>3</sub>, 2.47 wt.%, Al<sub>2</sub>O<sub>3</sub>, 1.61 wt.%, MnO, 0.350 wt.%, P<sub>2</sub>O<sub>5</sub>, 0.153 wt.%, and CuO, 0.107 wt.%. As Fig. S1 shows, increased temperature would increase the leaching of iron from Fe<sub>3</sub>O<sub>4</sub>.

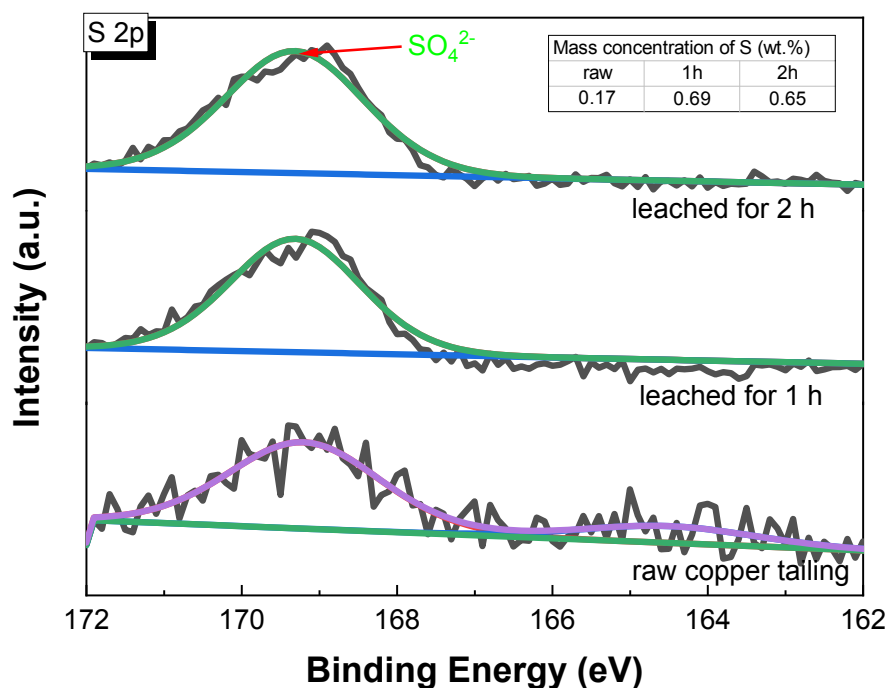

**Fig. S2** S 2p spectra for the raw and leached copper tailings.

**Table S1** Peak positions, FWHM, and relative abundance from curve fitting of O 1s for raw and leached copper tailings.

| Sample         | BE (eV) | FWHM (eV) | State of oxygen                   | Percentage (%) |
|----------------|---------|-----------|-----------------------------------|----------------|
| Raw copper     | 530.85  | 1.85      | Si-O-Fe (II)                      | 51.82          |
| tailing        | 532.50  | 4.42      | Fe-O-Fe (II)/Si                   | 10.49          |
|                | 531.98  | 2.06      | Fe (II)-O-Fe (III)                | 37.70          |
| copper tailing | 531.07  | 1.99      | Si-O-Fe (II)                      | 36.79          |
| after leaching | 532.84  | 1.45      | Si-O-Si                           | 16.13          |
| 1 h            | 533.30  | 2.58      | Si-O-Si                           | 10.97          |
|                | 532.16  | 1.55      | Fe-O-Fe (II)/Si                   | 36.11          |
| copper tailing | 532.16  | 2.13      | Fe-O-Fe (II)/Si                   | 78.77          |
| after leaching | 530.38  | 1.52      | Fe(II) <sub>1-x</sub> -O-Fe (III) | 12.28          |
| 2 h            | 533.08  | 3.22      | Si-O-Si                           | 8.95           |

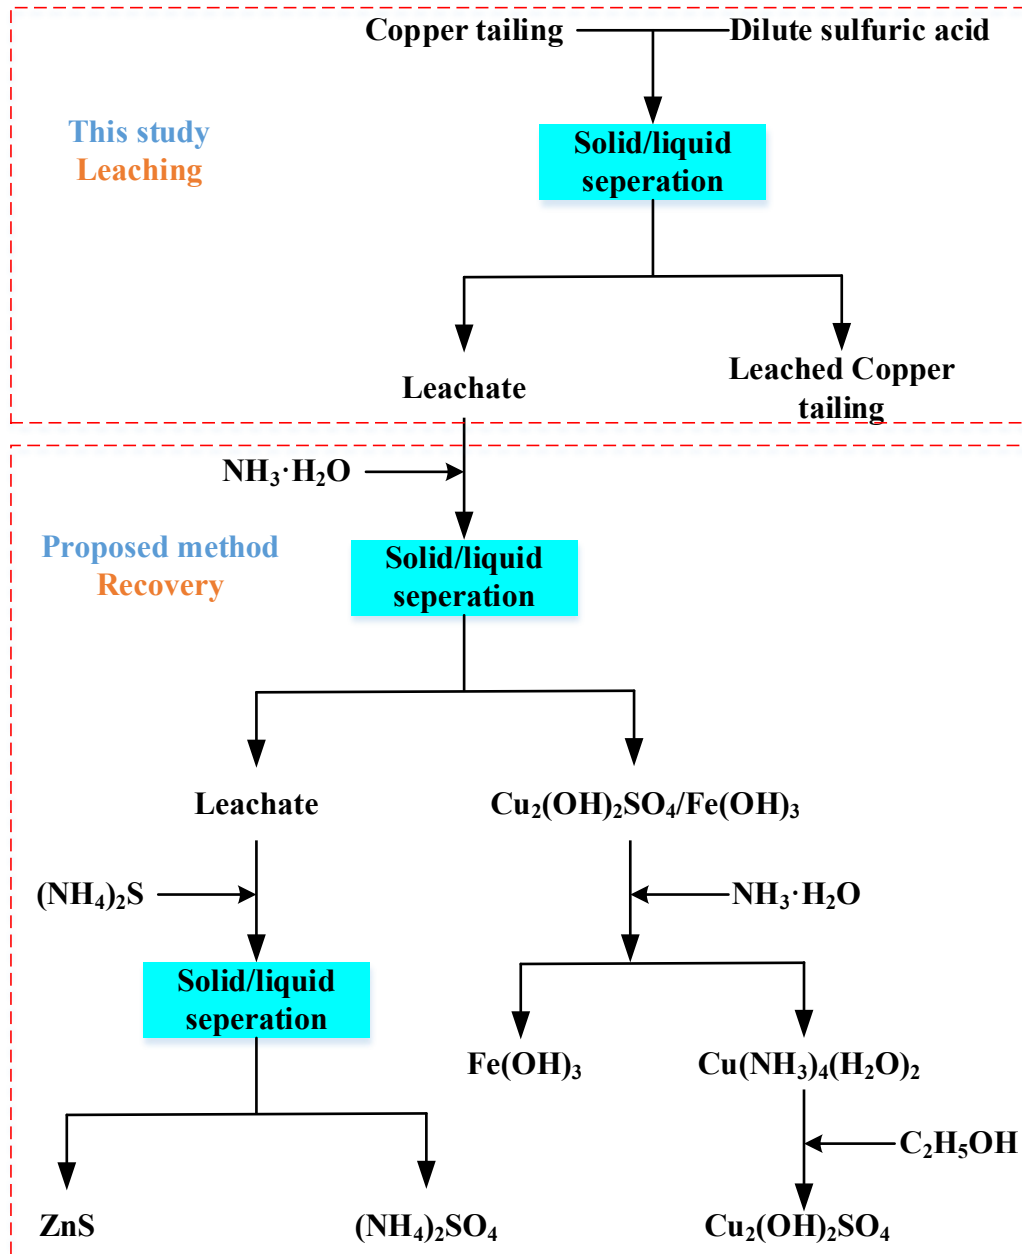

**Fig. S3** Flow diagram of recovery Fe, Zn, and copper from copper tailing by sulfuric acid leaching.
